# Supplementary material for: Where Is Ethology Heading? An Invitation for Collective Metadisciplinary Discussion
Source: Animals (Basel). 2021 Aug 27;11(9):2520. doi: 10.3390/ani11092520 (PMC8472011; doi:10.3390/ani11092520)
Supplement: Supplementary file 1 [file animals-11-02520-s001.zip › new 2nd supplementary-animals-1225637.xlsx]

## Sheet: Round1
Round	Do you agree to participate and allow me to publish some data to summarize the results of this questionnaire? All data will be anonymized. In case you do not, thanks for reading till here!	NATION_birth	NATION_now	DEGREE	AGE	EXPERIENCE	WORKPLACE	DISCIPLINE	CONC_consensus	INV_intra_inter	SPECIES_now	SPECIES_why	SPECIES_other	UMWELT_ecolapp	UMWELT_concept	UMWELT_example	Have you actively used some tech0logy in your studies? (avoid easy accessible tech such as cameras or stopwatches. I'm thinking of more sophisticated tech0logy, necessary or mandatory to conduct your research)	TECH_example	STAT_Example	TECH_Dreaming	STAT_Sample	STAT_Program	STAT_Analysis	NETW_freq	PAST	PRESENT	FUTURE	CHALLENGES
2	Yes :)	2	2	Philosophy		0 to 5 years	Lab/Zoo	Animal cognition	No, there is almost no consensus in the concepts of our discipline	1	1	2	Yes	No	1		1	Automatic food dispenser	For programming the automatic food dispenser.		2	1	Parametric	0	------	The lack of conceptual unity	Better conceptual foundations	More critical meta-analysis
2	Yes :)	3	3	Biology / Marine Biology	40	0 to 5 years	Lab/Zoo, Wild	Animal cognition	Yes, but there is consensus in only few concepts	1	1	1	Yes	Yes	2	Goffins are very “haptical” animals, they learn about the world by touch. We can not rely on (when we are designing experiments), even knowing that their vision is good	1	Computer simulations by AI	Boris coding program	Automatic coding/tracking of animal behavior	2	2	GLMM	2	Perspective change about birds brains and cognition	Replication	GWT and IIT theories about consciousness	More open access science
2	Yes :)	3	3	Psychology	40	10 to 20 years	Lab/Zoo	Animal cognition	Yes, but there is consensus in only few concepts	2	4	1	Yes	No	2	Understanding how that species perceives things e.g. colour vision	1	Robots, state of the art touchscreen setups	No	Yes, it allows you to understand cognition without potential confounds e.g. with robots, you can control their behaviour and therefore control for issues relatd to "demonstrator" behaviour.	2	1	Descriptive, Non-parametric, Parametric, Correlations, GLMM	2	Wow, this is difficult! I guess the move from studying primates, rats and pigeons to looking at other species. Using behavioural ecology rather than relatedness to humans to make predictions about cognition.	Replication. We need to replicate many more of our big experiments. I think we, as a field are extremely critical of others. Generally that is good as it pushes us to improve, however, it is not good when going for grants etc as we are not competing within the field but within a much broader area where other reviewers are more positive. I think this is a real issue and it will be difficult to ove…	Negative - Access to animals, funding Positive - Interdisciplinary collaboration	Sometimes people do not always go for the simplest explanation of a behaviour.
2	Yes :)	3	3	Biology / Marine Biology	37	10 to 20 years	Lab/Zoo	Animal behaviour	Yes, but there is consensus in only few concepts	1	2	6	Yes	No	2	Thinking about the animals' entire state and comprehension of something. We attempt to get at ecologically valid set-ups, but sometimes, you have to do something very unnatural, like get dogs to look at screens, and work with their own preferences.	1	Loudspeakers for playback, screens for visual stimuli, lots of microphones	I started with Gamebreaker for coding but now use Boris.	Yes, we're thinking about tablets and touch devices.	4	2	Descriptive, Non-parametric, Parametric, Correlations, Logistic regression, GLMM	2	The development of the idea that animals feel emotions and can think, which is still evolving.	Sample size, reliability of results, and over-interpretation of results. The n=1 model is gone but that's not necessarily a good thing if we're talking about rare events.	Any developments that get us communicating with animals more clearly.	Details on outcomes for the animals and considerations for their mental welfare as well as physical wellbeing.
2	Yes :)	3	3	Biology / Marine Biology	30	5 to 10 years	Lab/Zoo, Wild	Behavioural Ecology	Yes, but there is consensus in only few concepts	2	5	5	Yes	No	2	In my particular case with fish, they use chemical cues as much as visual cues so we also consider them or use them as stimuli for our tasks; also considering different motivations of males (mating) and females (food) so we often have to adapt the reward in our tasks	0		Boris, to score recording of trials	We are trying to develop aquatic Skinner boxes for automated testing of our subjects	5	2	Logistic regression, GLMM	0	Development of individual tracking devices small and relatively inexpensive to repeatedly test wild individuals	Focus on a relatively small number of species per taxa, based on which big hypotheses are developed (and sometimes become 'common knowledge'). Lack of replication studies, partially driven by the 'publish new ideas or perish' culture that we experience nowadays.	Scientific funding is becoming less accessible to fundamental science, and more accessible to applied science with short-term benefits to society. I think this will slowly shift the types of projects and research questions in our field	I miss that speculation and anecdotal accounts are rarely accepted in current studies
2	Yes :)	3	3	Other:	26	0 to 5 years	Lab/Zoo	Animal cognition and welfare	Yes, there is consensus in almost all the concepts of our discipline	2	4	1	Yes	No	0		0		boris		2	2	Non-parametric, Parametric, GLMM	0	don't know	the public disinformation	don't know	no
2	Yes :)	3	3	Biology / Marine Biology	40	10 to 20 years	Lab/Zoo, Free-Range/Natural Reserve, Wild	Animal behaviour	Yes, but there is consensus in only few concepts	1	5	1	Yes	No	0		1	cameras, tracking		real time tracking	5	2	GLMM	2	-	-	-	-
2	Yes :)	3	3	Biology / Marine Biology	35	5 to 10 years	Lab/Zoo	Animal cognition	Yes, but there is consensus in only few concepts	2	4	5	Yes	No	2	I try to take into account how species might be adapted and how captivity or extensive selective breeding might have changed their cognitive ability. That includes pre-experience with other tests that might have improved performance later on.	0				3	2	Descriptive, Non-parametric, Correlations, GLMM	0	open science guidelines and methods to study repeatability and make studies better reproducible	Non-reproducible results. Not enough meta-analysis due to bad data sharing practices. Biased publishing.	increasing meta-analysis and worsening of the reproducibility cirsis	If data is associated with a publication and it is stated that this data set is raw data but what it actually is are summary tables. I think people don't even know what raw data looks like...
2	Yes :)	5	5	Biology / Marine Biology	70	More than 20 years	Lab/Zoo	Animal cognition	Yes, but there is consensus in only few concepts	2	8	6	no	Yes	2	a sort of "artificial world"	0		no		4	1	Non-parametric, Parametric, Correlations	2	workshops, conferences	don't know exactly	don't know exactly	don't know exactly
2	Yes :)		3	Biology / Marine Biology		5 to 10 years	Wild	Animal behaviour	Yes, but there is consensus in only few concepts	3	3	2	Yes	Does not apply (because I work in the wild / because I do observational studies, etc)	0		1	geolocators: migratory tracking.	no.	Yes. Some tech devices allow to reduce the workload in the field and make it possible to study more complex questions.	5	2	Non-parametric, Parametric, Correlations, Logistic regression, GLMM, Big data analysis	0	any long term data.	lack of financial support.	Long term data, allowing to fully understand the effects of environmental cahnge.	meaningful long term analyses. Studies are usually designed to result in fast publications.
2	Yes :)	3	3	Biology / Marine Biology	48	More than 20 years	Lab/Zoo	Animal behaviour	Yes, but there is consensus in only few concepts	1	1	4	Yes	Yes	2	for example, trough responses to environmental enrichment	1	cameras and observation devices (softwares and hardewares)	Observer. Data collection	those tan facilitate data collection and analysis	2	1	Descriptive, Non-parametric, Correlations, GLMM	0	social networks analysis	time for data collection, low N and little impact of specialized journals	more release and applicability of the results	no
2	Yes :)	3	3	Psychology	29	0 to 5 years	Lab/Zoo	Animal cognition	Yes, but there is consensus in only few concepts	2	2	1	Yes	Yes	2	In my case it is very difficult, because the "umwelt" of dogs is the human environment. Even in free ranging dogs, they feed from human trash and they are familiar with human apparatus. However, I always try to design studies that are adapted to their normal mouvements.	0		Opensesame, to present auditory stimulus.	Yes. I know people using eye tracking or touchscreens (dogs love them), or camera system to track biological mouvement. This would be very useful to code videos/response in a more objective way.	4	2	GLMM	2	Before the Wolf Science Center, most of the studies were focus on dogs' cooperative skills, assuming that they came from domestication. When they WSC compared wolves and dogs, they found that wolves are generally more cooperative than dogs. I think that was groundbreaking finding that challenged a lot of ideas.	I would say that people are "in love" with their hypothesis. Different labs defend different ideas and design studies explicitely to confirm them, usually over-selling their findings. I miss more objectivity. One big challenge of the study of dogs is that they are not very perseverant, less explorative than other species and generally side bias. That makes very difficult to test them using the cl…	More studies of free ranging dogs and feral dogs	A connection between the "why" and the "how". Usually people are interested in one of the two questions, and they ignore the other. I miss a more comprehensive interpretation of the data.
2	Yes :)	1	1	Other:	31	5 to 10 years	Free-Range/Natural Reserve, Wild	Animal cognition	Yes, but there is consensus in only few concepts	1	9	1	Yes	No	2	We carefully applied knowledge of hyena social systems, physical morphology, visual, and olfactory systems when designing test apparatus and when developing test protocols to encourage/facilitate participation.	0		BORIS- for coding videos ImageJ- for extracting size measurements from still images of animals	Yes, I think RFID tags/collars for automated testing would be great because it remove the human observer from tests of cognition in the field.	4	2	Descriptive, GLMM	0	Personally I'm excited for the idea of embodied cognition and I think it is gaining some traction. Inventions I think the advances of GPS collaring and other ways of remotely monitoring animals are going to really enhance the field by allowing us to measure behavior & cognition in both habituated and non-habituated animals without interfering with their behavior.	I think a major problem in the field of ethology and animal behavior more broadly is the move away from centering research on an organism to centering research around a question. While question-centered research good on the surface it means that researchers are no longer spending years getting to know a single organism and becoming an expert in their ecology and instead jump from organism to orga…	Hm, it's hard to predict the future. Covid is obviously limiting our ability to travel to field sites and form collaborations, share research at conferences, etc.	I don't think so.
2	Yes :)	1	1	Psychology	31	5 to 10 years	Lab/Zoo	Comparative psychology (non human and human species)	Yes, there is consensus in almost all the concepts of our discipline	1	9	5	Yes	No	2	I studied skunk visual abilities before creating a puzzle apparatus for them and began the process of designing a non-visual causal reasoning study for them (because they do not appear to primarily rely on vision for finding food). However, the organization with the skunks had changes in management and goal direction which ended the research.	1	Touch screen computers, for testing concepts, inhibitory control, flexibilty	Yes, for touch screens: PsychoPy	Yes, because touch screens are useful for "asking" many different kinds of questions to many different species.	1	1	Descriptive, Non-parametric, GLMM	0	na	Collaboration and communication with human cognition research. E.g., concept learning and inhibitory control studied in humans vs. non-human animals act like totally unrelated fields (papers do not cite each other, etc.). How to conduct and understand statistics on small samples (e.g., lots of data from one or several animals),	Animal welfare movements, for good and bad. Some advocates believe animals in zoos should have minimal interaction with humans and only interact with "natural" items, which ignores the fact that many animals can form social connections with humans, which usually makes them more comfortable living in zoos (with feeding , husbandry, and veterinarian techniques). Man-made items can form interesting …	References to knowledge on comparable human cognition
2	Yes :)	1	1	Psychology	70	More than 20 years	Lab/Zoo, Wild	Animal cognition	Yes, but there is consensus in only few concepts	2	3	2	No	Yes	2	Devised an aviary test that even a shy, conservative, non-problem solving species can pass	1	Transcriptome	No		4	2	GLMM	0	The avian brain consortium	Too much work on domestic species	Techniques to study the brain connectome	Open mindedness and empirically-based opinions about g versus modularity
2	Yes :)	1	1	Other:	79	More than 20 years	Lab/Zoo, Wild	Ethology	Yes, but there is consensus in only few concepts	1	4	4	No	No	2	Clear in my many publications. Consider my formulation of 'critical anthropomorphism'	1	Computer-based video analysis, molecular genetics, Pit Tags, computer modeling	Noldus Observer	NA -	4	1	Descriptive, Non-parametric, Parametric, Correlations, Logistic regression, GLMM	2	audio and video recording and automated methods of doing so, such as trail cams. DNA paternity testing, computer simulation, social network analysis	Ignoring blind testing, interobserver reliability analysis, alternative hypotheses, field experiments	Pandemics, lack of person to person contact at meetings and research sites, reductions in funding, species extinctions or declines, climate change, pollution (noise, light, air, water, etc.)	Ecological, ethological, and Umwelt sophistication
2	Yes :)	3	3	Biology / Marine Biology	39	5 to 10 years	Lab/Zoo	Animal behaviour	Yes, but there is consensus in only few concepts	1	5	5	Yes	No	0		0			Yes, very high speed cameras for tracking very rapid behaviours in environments with several individuals moving freely. Eye and gaze tracking software for fish.	3	2	Descriptive, Non-parametric, Parametric, Logistic regression, GLMM	2	Cheap, small and reliable video camera and PC technology for recording and saving large amounts of behavioral data and removing the need for not taking etc during experiments, reducing some sources of experimenter bias and missing events.	Lack of money, and relatedly too few early career jobs or alternate research career pathways. Different researchers using the same behavioral assays to measure or interpret measures in very different ways. E.g. Tests for activity/ exploration/ boldness/ emergence.	Changes in policy and regulations on restrictions on use of animals in laboratories. Even better tracking software and hardware. More common use of (RFID) and tagging etc. Development of algorithms for collecting data automatically.	No
2	Yes :)	1	1	Psychology	59	More than 20 years	Lab/Zoo	Comparative psychology (non human and human species)	Yes, there is consensus in almost all the concepts of our discipline	3	1	6	Yes	No	2	Almost all of my studies require animals to respond in situations that are very different from those in the organisms' natural ecology, to stimuli that are very different to those in nature; however, the animals I study are adapted to learn in novel situations, to solve problem that contribute to finding food and surviving, and to social behavior. Artificial laboratory tests that require animals …	1	90% of my research involves monkeys playing computer games	self- or collaborator-programmed	I'd happy expand my use of any technology that the animals could use, if it would help me to understand their cognitive competencies	1	1	Descriptive, Non-parametric, Parametric, Correlations	2	Each significant apparatus innovation or instrument has the potential to be an inflection point, from the Skinner Box to the computer-task paradigm	funding, regulatory control, and public perception	the pandemic, the resulting financial crisis, and the steady increase in over-regulation	I don't understand this question
2	Yes :)	1	1	Psychology	36	10 to 20 years	Lab/Zoo	Comparative psychology (non human and human species)	No, there is almost no consensus in the concepts of our discipline	2	7	5	Yes	No	2	The species sensory capabilities always have to be considered when designing an experiment. I do a lot of work in conditioning. It would be pointless to present a stimulus that was imperceivable to an animal, or produced some response (as a function of that animal's natural history) that was incompatible with what I was trying to investigate.	1	Oh yes, my dissertation was actually on automated software to detect behavior and implement consequences.	Most of my work is done in Python. For embedded technology I use the Propeller microcontroller for basic automation and the Raspberry Pi microcomputer for computer vision.	I want to do more computer vision work.	5	3	Descriptive, Non-parametric, Parametric, Correlations, Logistic regression, GLMM, Big data analysis	2	I like the Comparative Cognition Society. I also attend the Association of Behavior Analysis conference, but this one has a different focus with less animal behavior and comparative psychology type research.	1) Lack of parsimony with respect to interpreting results. 2) Lack of species diversity 3) Lack of funding / interest in the field - This may be US specific. I see little work in US psychology now, but good research from European biologists.	I cannot think of a specific event.	I don't understand the question
2	Yes :)	3	3	Biology / Marine Biology	54	More than 20 years	Lab/Zoo, Free-Range/Natural Reserve, Wild	Ethology	No, there is almost no consensus in the concepts of our discipline	2	1	1	Yes	No	1		1	handhelds, stop watches, experimental apparatuses, video cameras, GPS collars, drones		silent drones	3	2	Descriptive, Logistic regression, GLMM	2	Publikation of "How monkeys see the world"	Too much bullshit.	Climate change, habitat destruction	Too many p values or parameter estimates, too little attention to good descriptions of the actual behaviour.
2	Yes :)	3	3	Psychology	54	More than 20 years	Lab/Zoo	Animal cognition	Yes, but there is consensus in only few concepts	3	6	2	Yes	No	2	paying attention to stimuli visibility and relevance, tasks requiring responses in the natural range	0			behavioural scoring technologies	4	1	Parametric	0	/	/	some consensus conferences, more interdisciplinarity	/
2	Yes :)		3	Biology / Marine Biology		0 to 5 years	Lab/Zoo	Animal cognition	No, there is almost no consensus in the concepts of our discipline	1	2	3	I don't know	No	0		0		Solomon coder for video coding	no	1	2	GLMM	0	Morgan's canon, probably.	Hyperspecialization; by working on a species or topic that's not being tackled by any other lab, the process of peer review itself suffers the risk of becoming meaningless, as there are no true "peers" that can properly assess the quality of the research.	Possible future attempts to replicate previous studies.	Proper description of the methods, very especially in what concerns the statistical analyses carried out.
2	Yes :)		3	Biology / Marine Biology		0 to 5 years	Lab/Zoo	Animal cognition	Yes, but there is consensus in only few concepts	1	2	1	Yes, horse and chicken, the question I am interested also applied to those species.	No	0		1	Polar watch system , ECG equipment and implant to measure heart rate,	Yes, Solomon coder and Boris for coding behaviour, R for statistic and Mathemativa and Kubios to process heart rate data	Yes, I would like to conduct study in the wild as such collaring and implanting wild animal with devices measuring there biology is I think the best way to collect huge amount of data with a minimal impact on wild animal behaviour	3	2	Descriptive, Non-parametric, Parametric, GLMM	1	Lorenz and Tinbergen work.	The lack of communication between labs working on the same thing, the lack of publications of negative results, the replication crisis.	The advances of technology and robotization could help us creating new devices or new way to collect data.	no
2	Yes :)	3	3	Biology / Marine Biology	29	5 to 10 years	Wild	Primatology	Yes, but there is consensus in only few concepts	3	1	3	Yes	Yes	2	I adapt the experiments to what is relevant for the species (e.g. in term of colours, smell etc.)	0		I code videos on ELAN, I run acoustic analyses on Raven, PRAAT. GPS data are processed with Garmin Base Camp and QGis	Yes: video-coding is a nightmare and I would love to involve more AI in this process. I also mostly use notebooks on the field, which I love because it allows me to take note of everything I want, but data processing is difficult after that, I would like to switch to electronic devices for my observational data. I avoid using automatic acoustic analyses software because they can't detect my speci…	4	2	Descriptive, Non-parametric, Parametric, Correlations, Logistic regression, GLMM	1	the field is moving towards more open access, more ethics, which is great!	People are reluctant to share their data, limited inter-field collaborations, and Europe/US researchers sometimes exploit the South's primate field sites	I hope that the Covid will help researchers re-think the way they work abroad and don't involve local people in research projects	NA
2	Yes :)		3	Biology / Marine Biology		More than 20 years	Lab/Zoo, Free-Range/Natural Reserve, Wild	Ethology	Yes, but there is consensus in only few concepts	2	1	5	Yes	Does not apply (because I work in the wild / because I do observational studies, etc)	0		1	Acoustic cameras	Yes. Praat, BORIS, Behatrix, Photoshop, Terminal, Filezilla, OBS, ...	Yes. Acoustic cameras.	4	2	Descriptive, Non-parametric, Parametric, GLMM, Big data analysis	0	Open Source Software	Little money to buy instruments	Collectively developed open source software	A quantitative approach.
2	Yes :)	5	3	Biology / Marine Biology	31	5 to 10 years	Free-Range/Natural Reserve, Wild	Animal behaviour	Yes, but there is consensus in only few concepts	1	1	2	Yes	Yes	2	I make sure during field experiments to control for social factors as much as possible which I argue might also controlling for the umwelt	1	Drones as predator model	BORIS for video coding, PRAAT and RAVEN for acoustic analyses	Deep learning for monitoring behavior	2	2	Descriptive, Non-parametric, GLMM	1	Criticism of referentiality , Social network analyses	More focus on using new techniques but less new insights in recent years	Not sure	Descriptive observations even if they are anecdotes they are important
2	Yes :)	1	3	Biology / Marine Biology	38	5 to 10 years	Lab/Zoo	Animal behaviour	Yes, but there is consensus in only few concepts	1	3	3	Yes	No	0	The word "Umwelt" means "Environment" in German and is a completely normal word. I'm not sure how it is used in English.	0		Praat and Audacity for analysis of vocalizations	No	1	1	Descriptive, Non-parametric, Parametric, GLMM	2	Hamilton 1964 Kin Selection; Nobel Prize 1973 Lorenz, Tinbergen, von Frisch	low sample size when studying larger, long-lived species; lack of funding for research; difficulty for women trying to have successful careers; lack of diversity in researchers	I think we really need to connect research in ethology to current real world problems like climate change, habitat loss, extinction crisis etc. if we are going to remain competitive and continue to get funding for research. It is also important for me personally to stay connected to real world problems. Specific events - #metoo - there is a huge need to address the male-dominated culture in our f…	sorry I don't understand the question
2	Yes :)	3	3	Biology / Marine Biology	30	0 to 5 years	Lab/Zoo, Free-Range/Natural Reserve, Wild	Animal behaviour	Yes, but there is consensus in only few concepts	2	1	4	Yes	Does not apply (because I work in the wild / because I do observational studies, etc)	0		0		Yes. I use a range of programs, but in my current project it is mainly pedigree construction software like Colony or Cervus	Wristband date loggers for primates that record inter-individual distances and type of behaviour from their (arm) movements	5	2	Descriptive, Correlations, GLMM	1	Open data	Funding options and data sharing	Interdisciplinary exchange of knowledge	The bigger picture (could be just 1 sentence)
2	Yes :)	3	3	Other:	24	0 to 5 years	Lab/Zoo, Free-Range/Natural Reserve	Animal behaviour	Yes, but there is consensus in only few concepts	1	2	2	Yes	No	0		0	Heart rate monitoring device	Televet:Heart rate, Solomon Coder: Videocoding		4	2	GLMM	0	Extension of research to other animals than primates	Financial issues	Implementing more and more technology	No
2	Yes :)	3	3	Biology / Marine Biology	33	0 to 5 years	Lab/Zoo	Animal cognition	Yes, but there is consensus in only few concepts	1	2	4	Yes	No	0		0		Slicer 3D and BORIS, the first to work on 3D models and the latter for behavioural measurements		4	3	Descriptive, Non-parametric, Parametric, Correlations, GLMM	1	Evidence of rapid learning in dogs	Lack of repeatability of the results. Too many papers built on previous claims that are surprisingly very hard to replicate	I don't know how to answer to be honest	Not many studies accounting for the large individual variation
2	Yes :)		3	Biology / Marine Biology		10 to 20 years	Lab/Zoo	Comparative psychology (non human and human species)	No, there is almost no consensus in the concepts of our discipline	3	1	1	Yes	Yes	2		0				3	1	Non-parametric	1	Emulation	Replication crisis - too many wrong findings get published / shoddy methods get accepted	Full erasion of what is out there, and a restart	Controls and good methods
2	Yes :)	1	1	Psychology	77	More than 20 years	Lab/Zoo	Psychobiology	No, there is almost no consensus in the concepts of our discipline	2	1	3	Yes	Yes	2	I focus on the world of the infant and how the state of their senses and motor actions relate to their situation to provide experiences that enable them to transition into other states, etc.	0		R & HLM especially for their ability to work with complex variable relations	perhaps - more sophisticated assessment of daily actions and not just activity level.	5	3	Non-parametric, Logistic regression, GLMM	1	Evo-Devo	Inadequate education of researchers in research design and analytic philosophy	Ability to recognize that animal minds will not be readily assimilated into intuitive conceptions of human minds	failure to examine the anthropomorphic descriptions of animal cognition
2	Yes :)	2	2	Other:	28	0 to 5 years	Lab/Zoo	Ethology	Yes, there is consensus in almost all the concepts of our discipline	1	6	2	Yes	No	0		0				1	3	Descriptive	1	more human habilites like critical thinking	public investment in research	the change in people's thinking about animals	no
2	Yes :)		3	Biology / Marine Biology		0 to 5 years	Lab/Zoo, Free-Range/Natural Reserve, Wild	Animal behaviour	No, there is almost no consensus in the concepts of our discipline	1	1	3	Yes	Does not apply (because I work in the wild / because I do observational studies, etc)	0		0			less invasive methods of observation e.g. camera traps that are not bothersome, near silent dornes	3	2	Descriptive, Non-parametric, Parametric, Correlations, GLMM	2	Animal personality, methods for studying culture	Anthropocentrism and a disconnect between the work we do and its ethical implications	Increased recognition of sentience and emotional capacities of animals	A more detailed explanation of what the ethical implications are of their work, and advocating for that. Focus too much on objectivity (to point of anthropodenial)
2	Yes :)	3	3	Psychology	34	5 to 10 years	Lab/Zoo, Free-Range/Natural Reserve	Comparative psychology (non human and human species)	Yes, but there is consensus in only few concepts	3	3	4	Yes	No	1	I try to design studies that are ecologically relevant for my species and I test using voluntary participation, with the aim that my subjects are comfortable taking part and respectful of their responses to this.	0		Solomon Coder for video coding, Slack and Dropbox/ Google drive for collaboration	Yes - I plan to use automatic coding for behavioural experiments, and RFID tags and technical system for planned fieldwork	2	2	Descriptive, Non-parametric, Logistic regression, GLMM	2	Multi-lab collaborations to increase sample sizes and promote open science	Similar to others - lack of jobs, highly competitive funding often going to the same small proportion of labs. Replication crisis. Lack of applied consequences to research output	I’m not really sure what this means	No
2	Yes :)	3	6	Biology / Marine Biology	36	5 to 10 years	Wild	Animal behaviour	Yes, but there is consensus in only few concepts	2	3	2	No	Yes	0		0		Ethovision (for behavioral observations in captivity), ImageJ (patterns and color analyses)		4	2	Descriptive, Non-parametric, Parametric, Correlations, Logistic regression, GLMM, Big data analysis	1	Not sure that I can see any "inflection point", I see it more as a continuous process. If I had to pick one, I'd say the development of large phylogeny, and improvement of computer processing time and calculation abilities, making it possible to study the evolution of cognition and its consequences over large taxonomic scales.	I have nothing very specific to ethology in mind. But in general, the lack of funding for fundamental research, and the publication pressures, which switches the focus on publications rather than important questions.	another pandemic??	Nothing in our discipline in general; it is really study-specific, I don't really see a general thing here. Maybe, a better integration of lab studies into the evolutionary and ecological contexts in which the model species occurs in the wild?
2	Yes :)		1	Psychology		More than 20 years	Lab/Zoo	Animal cognition	Yes, there is consensus in almost all the concepts of our discipline	3	8	1	Yes	No	0		1	Octagonal operant chambers for 8-choice procedures with lighting cues, touchscreens for 8-choice circular array procedures, brain-stimulation reward or water reward for immediate/brief reward/feedback.	Med Systems Medstate (software) for controlling water/brain-stimulation reward operant tasks in octagonal chambers plus our own touchscreen software for touchscreen versions of the task.	Response tracking within our octagonal 8-choice apparatus.	1	1	Parametric	1	Several inflection points and related developments: Pavlov's systematic empirical studies employing objective measurements of behavior; behaviorism; operant chambers, ethological methods; animal cognition methods; electronics/computers contributing to better observation and analysis of complex behavior; computer modeling	Not enough funding for basic research unless it is neuroscience-oriented or "applied." Not enough communication with related fields such as neuroscience.	Larger and more diverse international meetings on animal cognition would stimulate more collaboration and innovation. Perhaps larger virtual meetings - despite their limitations - could serve as a mechanism for creating more frequent and fertile cross-talk and perhaps collaboration.	Difficult question...maybe, would like more connection to literatures that are more molar or molecular than the study described in the paper.
2	Yes :)	1	1	Other:	71	More than 20 years	Lab/Zoo	Animal cognition	Yes, but there is consensus in only few concepts	3	3	6	No	No	2	Try to recreate the natural learning environment of my subjects	1	Not USUAL, but have used MRI, x-ray video, CAT scans	No	No	1	3	Descriptive, Parametric	1	The cognitive revolution	Widespread use of things like GLMMs without full understanding of what they can and cannot do; failure to recognize that individual differences in nonhuman behavior are extremely important -- lumping data across groups causes all sorts of over- and under-interpretation of results.	Clearly events like COVID but also those connected to climate change--mass extinctions, inability to return to field sites, destruction/closures of laboratories. Also lack of funding because funds are directed toward human welfare.	Admissions of limitations of studies
2	Yes :)	3	3	Biology / Marine Biology	48	More than 20 years	Lab/Zoo, Wild	Animal behaviour	Yes, but there is consensus in only few concepts	1	7	4	Yes	Yes	2	All my studies are ecologically informed in terms of putative selection pressurces, challenges faced, and so on	1	Omics technologies (transcriptomics and proteomics); micro X-ray CT scanning	No	Always. Particularly interested in micro-visualising technologies at the moment, to get inside insects during copulation.	5	1	Descriptive, Non-parametric, Parametric, Correlations, Logistic regression, GLMM	2	Tinbergen's 4 Questions; Hamilton's Rule; Genomics Revolution to name but three	Rampant anthropomorphism. It is EVERYWHERE today and it is eroding our science in plain sight.	Not sure what this means.	High quality experimental design.
2	Yes :)	3	3	Psychology		5 to 10 years	Lab/Zoo	Comparative cognition	No, there is almost no consensus in the concepts of our discipline	3	1	1	Yes	No	1		1	touchscreens	I don't know what this question refers to, I use dozens of different software packages for my research	if it could be ethically done, EEG and EMG would have useful applications	1	2	Descriptive, Parametric, Correlations, Logistic regression, GLMM	2	large scale cooperation (ManyPrimates)	very, very poor understanding of basic statistical principles, and of basic principles of measurement theory (test-retest reliability, convergent / divergent validity)	Funders (public and private) losing interest in comparative cognition because it turns out our research is at least as rife with questionable research practices and sensationalism as human social psychology has proven to be in the last 10 years	comprehensive description of methods, citing literature that is older than 20 years
2	Yes :)	3	3	Psychology	27	0 to 5 years	Free-Range/Natural Reserve	Animal behaviour	Yes, there is consensus in almost all the concepts of our discipline	3	2	4	Yes	No	2	If I am studying elephants, I try to think about how they perceive their world, e.g., provide auditory and olfactory cues (I think that's what umwelt means)	0				1	2	GLMM	0	mirror test for self-awareness (even though not always valid to test animals)	tests that are valid for all/most animals (e.g., string-pulling task)	climate change may affect the animals we are able to test or to find out how climate change can change animal behaviour	no
2	Yes :)	1	3	Psychology		5 to 10 years	Lab/Zoo, Wild	Animal behaviour	Yes, but there is consensus in only few concepts	3	1	6	Yes	No	1	Have come to appreciate umwelt only since designing previous experimental appartuses	1	Touchscreens, automatic feeders, operant chambers, computers for coordination, thermal imaging	Kivy for python - touchscreen app design	eye tracking, maybe	5	2	Descriptive, Non-parametric, Parametric, Correlations, Logistic regression, GLMM, Big data analysis	1	The Trimates, cognitive revolution, replication crisis	poor methodological and statistical rigor, small sample sizes, bias in individial and species sample selection, perverse incentives in academia	Species extinction/other causes of shrinking of the potential subject pool, ecological shock	I don't understand exactly what is meant by "miss" in this question
2	Yes :)	3	2	Psychology	32	5 to 10 years	Wild	Biological Anthropology	Yes, but there is consensus in only few concepts	3	1	1	Yes	Does not apply (because I work in the wild / because I do observational studies, etc)	0		1	Telemetry, Passive Acoustic Recorders, GPS...	In daily basis, I use an Ipod with an specific software for data collection		2	2	Descriptive, Logistic regression, GLMM	2	Telemetry has been a huge advantage in field work	Lack of funding, lack of jobs opportunities	Well, I would´t recommend another pandemic...jokes apart, if we want to really understand evolutionary and ecological processes we need more funding in field studies. But the main impact I think would be to achieve more dialogue between the different specialist involved in our "daily" work (statisticians, computer engeneers, primatologist, ornithologist, you name it) in order to try to do better …	A real understanding of the statistical analyses they are doing
2	Yes :)	3	3	Other:	35	5 to 10 years	Lab/Zoo	Ethology	Yes, but there is consensus in only few concepts	1	9	3	no	No	1	review of echolocation in tenrecs, hawthorn effect considerstions. lighting	1	noctunal cameras/cctv, data loggers, gps	noldus		2	3	Descriptive, Non-parametric, Correlations	0	unsure	funding limitations, replication for captive wild animal studies as numbers very limited	brexit and collavorative opportunties. zoos surviving the pandemic. wider knowledge of animal behaviour through accessible communication of science online	not sure what you mean here sorry
2	Yes :)		3	Biology / Marine Biology		5 to 10 years	Lab/Zoo, Wild	Animal cognition	Yes, but there is consensus in only few concepts	1	1	2	Yes	No	1	It is very difficult to assess the umwelt of a species (despite probably being easier for primates because they are close to us) and I wonder at which point humans and human products become part of it for captive animals.	0		The Observer for video analysis		3	2	Descriptive, Correlations, Logistic regression, GLMM	0	Big data analysis, automatization of data collection (GPS tag, thermography...) and analysis (artificial intelligence: facial recognition...)	The advance in statistics and programming. If you did not receive such training at the University, it is difficult to keep a good level and understanding the new techniques	new technology and novel statistical tools	modelling analysis
2	Yes :)	3	3	Other:	72	10 to 20 years	Lab/Zoo	Animal behaviour	Yes, there is consensus in almost all the concepts of our discipline	1	7	1	Yes	No	1	I rarely use this idea.	1	sound analysis equipment	sound analysis and behavioural analysis	I have retired	5	3	Non-parametric, Parametric, Correlations, Logistic regression, GLMM	1	computer behaviour data collection	applyimng good welfare.	pass	statements about welfare protection
2	Yes :)	3	3	Biology / Marine Biology	34	5 to 10 years	Lab/Zoo, Wild	Animal behaviour	Yes, there is consensus in almost all the concepts of our discipline	2	3	1	Yes	Does not apply (because I work in the wild / because I do observational studies, etc)	0		1	sound analysis softwares, automatic detection programs, etc.	Avisoft SASlab, Raven (Sound analysis), Qgis (SIG, mapping)	working at the individual level, Biologgers able to follow and collect data on an individual location, feeding habits and biometrics would be amazing. Current technology allows some awesome "tricks" with large animals, but still remain hard to apply to small birds, especially when it comes to long-term topics like migrations.	3	2	Descriptive, Non-parametric, Correlations, GLMM	2	Animal personnality and "emotions" seems news for a lot of people, though it is quite an obvious path the explore, probably due to the risk of anthropormorphic considerations. The understanding of animal cognitive abilities, complex communication and complex social interactions will probably help build some bridges between disciplines	Shortage of fundings and loss of biodiversity aside? I think the impulse to compare all to humans (either avoiding too "antropomorphic" or human-related topics as much as giving them too much attention as attractive projects) might be a bad thing. Scientists studying our field need a more global and deep vision out of their specialities, and that is where a more naturalistic and "behavioural ecol…	The consideraiton of different layers of what make a behaviour, from genes, to learning and the share of information that might be inherited that way and evolve "culturally". I keep "discovering alien intelligence" as a bonus answer. On a more technological angle, self-learning programs (for auto-detection and pattern recognition for example) and modelling should reach some tremendous levels in t…	Quality reviews and an actualized overview of some key research questions
2	Yes :)	3	3	Psychology	36	5 to 10 years	Lab/Zoo, Free-Range/Natural Reserve	Animal cognition	No, there is almost no consensus in the concepts of our discipline	1	1	6	Yes	No	0		1	eye tracking for measuring the attention and arousal (pupil size) of animals; multi-camera systems for reconstructing 3D coordinates of the body of animals; automatized feeders and apparatuses to reduce the potential impact of the experimenter	Experiment builder / data viewer for eye tracking; Loopy for 3D reconstructions	fMRI and Transcranial magnetic stimulation to learn more about information processing in the brain	4	2	Descriptive, Non-parametric, Parametric, Correlations, Logistic regression, GLMM	2	the development of multi-center collaborations such as ManyPrimates and ManyDogs	small sample sizes; questionable research practices; insufficient training in stats, data management and computational reproducibility	the requirement to register all study plans (at least for studies that aim to conduct null hypothesis testing); the adoption of registered reports; focus on replications	large sample sizes, data and code sharing, preregistration of study plans
2	Yes :)	1	1	Other:	35	5 to 10 years	Free-Range/Natural Reserve	Ethology	Yes, but there is consensus in only few concepts	1	9	3	Yes	No	2	understanding sensory modalities of my species and how I can use that info to deliver tests	1	PIT tags and RFID-enabled operant conditioning devices to deliver reversal learning trials	no	yes. machine learning to identify individual animals because that eliminates the issues of not knowing whether the animal you are seeing is the same as in other observations, helps with observational and experimental investigations, can potentially increase sample sizes	3	2	Descriptive, Non-parametric, Logistic regression, GLMM	1	directly testing cognition in the wild	finding ways to overcome challenges to studying cognition in the wild for a variety of species in large sample sizes	development of new technologies that will increase sample sizes for field studies	how behaviors are interpreted and why (eg why a certain behavior is interpreted as aggressive if we do not know much about the species in the first place)
2	Yes :)	3	3	Other:	54	More than 20 years	Lab/Zoo	Ethology	Yes, but there is consensus in only few concepts	3	7	1	Yes	No	1	Taking into account the physics of the world at different scales	0	3D motion analysis system, spectrometry, tomodensitometry to study strutures and behaviour	Matlab (Computation), ITK (Scan analysis), Vicon (Motion analysis)	I would use a synchrotron in real life	5	3	Descriptive, Non-parametric, Parametric, Correlations, Logistic regression, GLMM, Big data analysis	1	image	fundings of non immediatly profitable research	quantic instrumentation	An exhaustive description of the context and of the phyics of the arrounding.
2	Yes :)	3	3	Biology / Marine Biology	42	10 to 20 years	Wild	Ethology	Yes, but there is consensus in only few concepts	1	10	1	No	Does not apply (because I work in the wild / because I do observational studies, etc)	2	i use naturally occuring social scenarios to conduct playback experiments	1	ultrasound recording / playback devices, thermal / highspeed / infrared camera	sound analysis software (MATLAB; Avisoft SASLab Pro)	a portable fMRI that does not make loud noises	3	2	Descriptive, Non-parametric, Parametric, Correlations, Logistic regression, GLMM	2	portable equipment that allowed to study bat behavior in the wild	most taggs (GPS, remote sensing, etc.) are still to heavy to be carried by small animals (and the batteries run out too fast)	low-cost genomic sequencing	studying behavior in the wild before it is studied in the lab
2	Yes :)	1	1	Biology / Marine Biology	31	5 to 10 years	Lab/Zoo, Free-Range/Natural Reserve	Ethology	Yes, but there is consensus in only few concepts	2	8	1	Yes	Yes	2		1	electrophysiology, high speed cameras and posture tracking, modeling, imaging, neuronal manipulation, RFIDs, drone surveys	I use hundreds of apps and software and write my own- often FIJI - image processing and analysis, Python, Bonsai, Atom for ~ everything, Audacity for audio processing and analysis		2	3	Descriptive, Parametric, Correlations, Logistic regression, Big data analysis	2	tinbergen's four questions	the level of mechanism	wireless technologies for animal manipulation	I'm not sure what this question is asking
2	Yes :)		3	Biology / Marine Biology	yes (80 years)	More than 20 years	Lab/Zoo, Wild	Animal cognition	No, there is almost no consensus in the concepts of our discipline	2	7	1	Yes	Yes	2	sensory systems, natural learning sets, navigation	1	highly complex technical system for practicall y all my research	yes	yes	5	3	Logistic regression, GLMM, Big data analysis	2	Karl von Frisch, Martin Lindauer, Tom Seeley, Eric Kandel	as said above: Ethology lacks a concept of animal cognition in a broader sense	Follow the cognitive turn in psychology and neuroscience	Ethology is a historical discipline and does not meet the most pressing questions of animal behavior anymore.
2	Yes :)	3	3	Biology / Marine Biology	34	5 to 10 years	Wild	Animal behaviour	Yes, but there is consensus in only few concepts	1	5	1	Yes	Does not apply (because I work in the wild / because I do observational studies, etc)	2	I tested exploration behavior in tree-roostin bats and designed a maze which they could crawl through and documented both spatial and echolocation behavior	1	Automatic song recorders, infra-red camera's, audio playback, video-playback, automatic tracking system	BORIS, for behavioral scoring. Easy to use, many features, good support, free	A device for tracking behavior of small fish in the wild; A device for tracking hatchlings	5	2	GLMM	1	rasberry pi system appears to open a lot of doors	following small individuals in a non-invasive way	Better ways to colobarate between labs from a distance	Acknowledgement that correlational instead of causal evidence is presented
2	Yes :)		3	Biology / Marine Biology		More than 20 years	Lab/Zoo, Free-Range/Natural Reserve, Wild	Animal behaviour	Yes, but there is consensus in only few concepts	3	3	1	No	Does not apply (because I work in the wild / because I do observational studies, etc)	0		1	GCMS to characterise odour			3	1	Descriptive, Non-parametric, Parametric, Correlations, Logistic regression, GLMM	0	? I am not sure what our discipline is	?	?	?
2	Yes :)	3	3	Biology / Marine Biology	27	0 to 5 years	Wild	Animal behaviour	Yes, but there is consensus in only few concepts	3	1	1	Yes	Does not apply (because I work in the wild / because I do observational studies, etc)	0		1	machine learning, more objective and less time consuming data processing, answer questions unexplored so far		Smartwatch as walkie talkies, speaker for playback experiments that are able to have a bluetooth connection from a considerable distance, plus reduced sized speakers, less heavy, without loss of quality	2	2	Descriptive, Non-parametric, Parametric, Correlations, Logistic regression, GLMM, Big data analysis	2	Machine learning	small data sets, inter-disciplinarity, time	international colloquium to agree on definitions	correct appropriation of human language vocabulary
2	Yes :)	3	3	Biology / Marine Biology	23	0 to 5 years	Lab/Zoo	Animal behaviour	Yes, but there is consensus in only few concepts	3	1	3	Yes	No	2	I take the concept of umwelt into consideration when assessing interactions with zoo visitors.	0		BORIS: for conducting behavioural observations (live and from video footage).	Yes! AI sensing of welfare relevant behaviours.	2	2	Descriptive, Non-parametric, Parametric, Correlations	1	Frans de Waal's concepts of empathy and morality, Martin and Bateson's Measuring Behaviour guide	small financial interest, small sample sizes, lack of technological knowledge among ethologists	More attention for mental health of animals	Considerations for animal welfare
2	Yes :)	3	3	Biology / Marine Biology	45	10 to 20 years	Lab/Zoo, Free-Range/Natural Reserve, Wild	Animal behaviour	Yes, but there is consensus in only few concepts	1	7	1	Yes	Does not apply (because I work in the wild / because I do observational studies, etc)	0		1	Simulation/modelling	species iD and citizen science apps	tags for smaller organisms to track movements etc.	5	2	Descriptive, Non-parametric, Parametric, Correlations, Logistic regression, GLMM	2	computational advances (stat, video modelling, analysis, tracking etc)	Funding and secure permanent positions	Even more technological advances (remote sensing, eDNA, modelling, machine learning biorobotics)	Nothing that I can think of.
2	Yes :)	3	3	Biology / Marine Biology	37	10 to 20 years	Lab/Zoo	Ethology	Yes, but there is consensus in only few concepts	2	7	2	Yes	Yes	2	when studying animal communication is essential to think about what can be perceived, not perceived by our target animal, in order to control/minimize the potential confounding factors in the experimental setting and just focus on the target variable	1	cameras, olfactometer, EAGs, vibrational shaker to playback substrate borne vibrations	no	automatic recognition of ID tag on individual animal, automatic tracking and identification of behaviour	4	1	Descriptive, Non-parametric, Parametric, Correlations, Logistic regression, GLMM	2	workshops with a limited number of participants	technological issues	development of automatic recognition of behavioural patterns	availability or original data (i.e. videos, pictures)
2	Yes :)	5	5	Biology / Marine Biology	38	10 to 20 years	Wild	Animal behaviour	No, there is almost no consensus in the concepts of our discipline	1	3	1	No	No	0		0		No	No	5	3	Descriptive, Non-parametric, Correlations	2	Kin selection; game theory	The belief that it is irrelevant	American elections	Natural history
2	Yes :)		2	Biology / Marine Biology		5 to 10 years	Lab/Zoo, Wild	Animal behaviour	Yes, there is consensus in almost all the concepts of our discipline	2	7	1	No	Does not apply (because I work in the wild / because I do observational studies, etc)	0		0		ImageJ	no	3	2	GLMM	1	Animal behavior congress: ISBE and ABS	Some questions about consequences of alternative mating tactics need parentage analysis and it is expensive.	More accesible genetic analysis	A good sample size
2	Yes :)	3	3	Other:	41	10 to 20 years	Lab/Zoo	Animal behaviour	Yes, but there is consensus in only few concepts	1	7	4	Yes	No	0		1	DNA and RNA sequencing; GC-MS		automatic tracking of individuals	3	2	Descriptive, Non-parametric, Parametric, Correlations, Logistic regression, GLMM	0	The old stuff: bias in studies (observer bias, p-hacking, not reporting of "negative" results, ...)	access to data, protocols, scripts used in the research - reproducibility	more pandemcis - prevent field studies and meetings in person; but allow more online cooperation across continents	detailed description of procedures (including statistics) - reproducibility
2	Yes :)	3	3	Other:	50	More than 20 years	Lab/Zoo	Animal behaviour	Yes, but there is consensus in only few concepts	1	6	1	Yes	Does not apply (because I work in the wild / because I do observational studies, etc)	2	OK, I will be transparent and say I did google Umwelt, because it's not a word that I usually use. I have come across it in my training, it is used in some important papers in animal welfare research, but it isn't widely used. When I say that I apply it in almost all my studies, I mean that I try my best to take into account that the way my study subjects perceive the world is shaped by their evo…	1	loggers for registering environmental temperature, thermography	Observer for behavioural recording.	I would like to continue to use these devices, I would love to have access to camera set-ups that are better prepared to work with small, fast, nocturnal, nestbuilding rodents, and I would also like to work more with automated processing of data.	4	1	Descriptive, Non-parametric, Parametric, Logistic regression, GLMM, Big data analysis	2	Implementation of consumer-demand studies to gauge animals' motivation in an animal welfare context (Marian Stamp Dawkins, late 1980s/early 1990s), cognitive bias to measure animal welfare (Mike Mendl / Elizabeth Paul, early 200s)	Measures of positive welfare, measures of behavioural aspects of	More open science, agreement on data format and data sharing are practices which I would hope to see more of, they can drive a more collaborative approach which I think will be fruitful. More agreement on validated methods and less of everyone running their own race.	In companion animal behaviour research I see way too much owner reported data and too little data collected by the researchers themselves. This seems to be an accepted practice in the field, in a way that would never be accepted in farm animal research. It goes unquestioned, and w/o any attempt to validate the approach.

## Sheet: Round2
Round	Do you agree to participate and allow me to publish some data to summarize the results of this questionnaire? All data will be anonymized. In case you do not, thanks for reading till here!	NATION_birth	NATION_now	DEGREE	AGE	EXPERIENCE	WORKPLACE	DISCIPLINE	CONC_consensus	CONC_Cogn	CONC_SocLearn	CONC_AssLearn	CONC_Tinbergen	CONC_EvolTheory	CONC_Culture	CONC_Tool	CONC_Emotion	CONC_CogCap	CON_Linguistics	CONC_Coop	CONC_Pros	INV_intra_inter	SPECIES_now	SPECIES_why	SPECIES_other	SPECIES_other_which	SPECIES_other_latin	SPECIES_other_why	UMWELT_ecolapp	UMWELT_concept	UMWELT_example	UMWELT_Senses	UMWELT_Ethogram	UMWELT_SexDifferences	How much relevant do you think it is considering these factors when designing an experiment? [Psychological characteristics (eg. shyness)]	How much relevant do you think it is considering these factors when designing an experiment? [Apparatuses resembling nature]	How much relevant do you think it is considering these factors when designing an experiment? [Social factors (eg. rank)]	Have you actively used some tech0logy in your studies? (avoid easy accessible tech such as cameras or stopwatches. I'm thinking of more sophisticated tech0logy, necessary or mandatory to conduct your research)	TECH_Lab_touchscreen	TECH_Lab_Autfeeder	TECH_Lab_Chambers	TECH_Lab_Eyetrack	TECH_Lab_ECGfMRXray	TECH_Lab_SoundAnal	TECH_Lab_GPSTrackingTelemetry	TECH_Lab_OMICs	TECH_Lab_Drone	TECH_Lab_Senses	TECH_Lab_CompSimulat
2	Yes :)	North America / Canada	North America / Canada	Biology /Marine Biology	43	10 to 20 years	Free range / Reserve, Wild	Animal behaviour	Yes, but there is consensus in only few concepts	3	2	2	2	3	1	2	1	3	3	3	2	1	7	4	Yes	Birds	insect predators	4	No	0	n/a	3	3	2	2	0	3	0	0	0	1	0	0	0	0	0	0	0	1
2	Yes :)	Europe	Europe	Psychology	23	0 to 5 years	Lab / Zoo	Animal cognition	Yes, but there is consensus in only few concepts	2	2	2	3	2	2	2	2	2	2	2	2	1	3	3	No	I responded "no" above	/	0	No	1	/	3	2	2	2	2	2	0	3	3	3	3	3	3	3	3	3	3	3
2	Yes :)	Europe	Europe	Zoology	21	0 to 5 years	Lab / Zoo, Wild	Animal behaviour	Yes, there is consensus in almost all the concepts of our discipline	3	3	3	3	3	2	2	2	3	2	2	2	1	3	2	Yes	Wild carnivores (Bear, Hyena...)	any	4	No	2	Feeding and potential "dangers" in their umwelt.	3	3	3	3	2	3	0	3	3	3	3	3	3	3	3	3	3	3
2	Yes :)	Europe	North America / Canada	Biology /Marine Biology	29	5 to 10 years	Free range / Reserve	Ethology	No, there is almost no consensus in the concepts of our discipline	1	1	1	2	2	1	1	1	1	1	1	1	2	1	1	Yes	Non-human primates	Macaca spp. (fuscata, mulatta, nigra...)	1	Does not apply (because I work in the wild / because I do observational studies, etc)	2	I design my studies, both observational and experimental from the animal perspective and keeping in mind the animal perspective as much as possible.	3	3	2	3	3	3	1	3	3	3	3	3	3	3	3	3	3	3
2	Yes :)	Europe	Europe	Biology /Marine Biology	36	10 to 20 years	Lab / Zoo	Animal behaviour	Yes, but there is consensus in only few concepts	2	3	3	3	3	2	2	2	1	2	2	2	2	10	1	Yes	Birds	All birds	1	No	1	I study the sense of touch, i try to understand how the animal perceives their world using the sense of touch - and think of other senses too.	3	2	2	1	2	2	1	0	1	2	0	0	0	0	0	0	2	2
2	Yes :)	Europe	Europe	Psychology	54	more than 20 years	Lab / Zoo	Animal cognition	Yes, but there is consensus in only few concepts	2	2	3	3	3	2	2	1	3	2	2	3	3	3	1	Yes	Insects	spiders	4	No	2	respect sensory and motor range and species' responses	3	3	3	3	3	3	0	1	0	0	0	0	0	0	0	0	0	0
2	Yes :)	Europe	Africa	Animal Behaviour	37	5 to 10 years	Wild	Animal behaviour	Yes, but there is consensus in only few concepts	2	2	3	2	3	2	2	1	2	2	3	2	2	3	3	Yes	Wild carnivores (Bear, Hyena...)	Felids	4	Does not apply (because I work in the wild / because I do observational studies, etc)	0	does not apply	3	3	2	2	2	2	1	3	3	3	3	3	3	3	3	3	3	3
2	Yes :)	Europe	Europe	Biology /Marine Biology	32	5 to 10 years	Lab / Zoo, Wild	Animal behaviour	Yes, but there is consensus in only few concepts	1	2	2	3	3	2	2	1	3	1	2	2	2	1	3	Yes	Rodents	Marmots, chipmunks, squirrels, beavers, common rats, domestic mouse	1	Does not apply (because I work in the wild / because I do observational studies, etc)	2	Draft a species specific ethogram and adapt tests to it, and especially to sensorial capacities and how animals of these species commumicate and investigate their environment	3	3	2	3	2	3	1	1	0	0	0	0	1	2	0	0	0	0
2	Yes :)	Europe	Europe	Biology /Marine Biology	25	0 to 5 years	Lab / Zoo	Animal behaviour	Yes, but there is consensus in only few concepts	3	3	2	3	3	2	3	1	2	3	2	3	1	1	1	Yes	Farm animals (Horses, chicken...)	Any farm animal	1	No	0	it does not apply	3	3	3	3	2	3	1	0	0	0	1	1	0	0	0	0	2	1
2	Yes :)	Asia	Asia	Biology /Marine Biology	32	5 to 10 years	Lab / Zoo	Animal cognition	Yes, but there is consensus in only few concepts	2	3	3	3	3	2	2	2	3	2	2	2	3	5	5	Yes	Non-human primates	Bonobos	4	No	0	it does not apply	3	3	2	2	2	1	1	0	0	2	0	0	0	1	0	0	0	2
2	Yes :)	Europe	Europe	Biology /Marine Biology	51	more than 20 years	Lab / Zoo	Ethology	Yes, but there is consensus in only few concepts	2	2	3	3	3	2	2	2	2	2	2	2	2	6	3	Yes	Not listed above (you'll be able to specify them in the next question)	Mammals in general	1	No	2	Considering original ecologal niche of domesticated animals	3	3	2	2	0	2	1	0	1	2	0	1	1	1	0	0	1	1
2	Yes :)	North America / Canada	North America / Canada	Psychology	48	more than 20 years	Lab / Zoo	Animal behaviour	Yes, but there is consensus in only few concepts	1	2	3	2	3	1	2	1	2	1	2	3	3	8	1	Yes	Birds	Corvidae	6	No	0	I replied no	3	1	3	2	0	2	1	0	0	0	0	0	0	2	1	0	0	0
2	Yes :)	Europe	Europe	Psychology	49	more than 20 years	Lab / Zoo, Free range / Reserve, Wild	Animal behaviour	Yes, there is consensus in almost all the concepts of our discipline	2	2	3	3	3	2	1	2	2	2	2	2	2	1	1	Yes	Not listed above (you'll be able to specify them in the next question)	Deer	1	Does not apply (because I work in the wild / because I do observational studies, etc)	1	It does not apply	2	3	3	3	2	2	0	3	3	3	3	3	3	3	3	3	3	3
2	Yes :)	Oceania	Europe	BSc Science with Honours Zoology	44	10 to 20 years	Lab / Zoo, Wild	Animal behaviour	Yes, but there is consensus in only few concepts	2	2	2	3	3	1	1	1	1	2	2	2	1	3	5	Yes	Invertebrates	Gromphadorhina oblongonota	2	Does not apply (because I work in the wild / because I do observational studies, etc)	0	NA	3	2	3	2	1	3	1	0	0	2	0	2	2	0	0	0	0	0
2	Yes :)	Africa	Europe	Biology /Marine Biology	50	more than 20 years	Lab / Zoo, Free range / Reserve, Wild	Animal behaviour	Yes, there is consensus in almost all the concepts of our discipline	2	3	3	3	3	3	3	2	2	1	3	3	2	3	5	Yes	Not listed above (you'll be able to specify them in the next question)	I am happy to study/think about ANY species	4	Does not apply (because I work in the wild / because I do observational studies, etc)	2	i always consider the relevant constraints acting on any system/set of systems I am modelling	3	2	3	2	0	3	1	0	1	1	0	0	1	1	0	1	1	2
2	Yes :)	North America / Canada	North America / Canada	Psychology	70	more than 20 years	Lab / Zoo, Wild	Animal cognition	Yes, there is consensus in almost all the concepts of our discipline	2	2	3	3	3	2	2	3	3	2	3	1	1	3	4	Yes	Invertebrates	Bombus	1	Yes	2	Avian vision	3	2	2	1	3	2	1	2	1	1	3	3	3	2	3	3	3	3
2	Yes :)	Europe	Europe	Biology /Marine Biology		0 to 5 years	Wild	Ethology	Yes, there is consensus in almost all the concepts of our discipline	2	3	2	3	3	3	3	2	3	3	3	2	1	3	4	No	I responded "no" above	does not apply	0	Does not apply (because I work in the wild / because I do observational studies, etc)	2	Trying to put myself in the mind of the model : eg. recording a song which couldn't be correctly analysed with the use of only our ears because of it complexity.	3	3	3	3	3	3	0	3	3	3	3	3	3	3	3	3	3	3
2	Yes :)	North America / Canada	North America / Canada	Philosophy	25	0 to 5 years	Lab / Zoo	Animal cognition	Yes, but there is consensus in only few concepts	2	1	3	2	3	1	2	2	3	1	2	2	1	2	4	Yes	Fish / Marine animals	Orcas, dolphins in general, octopus, corvids, canids, parrots, wild carnivores, farm animals (pigs, cows, chickens), sorry all of them!	4	No	1	Dogs sense of their own size and their ability to fit under small doorways.	3	1	0	2	1	3	1	2	0	1	0	0	1	1	0	0	0	0
2	Yes :)	Europe	Europe	Biology /Marine Biology	29	5 to 10 years	Lab / Zoo	Animal behaviour	Yes, but there is consensus in only few concepts	1	2	3	3	3	1	2	1	2	2	2	2	2	8	1	Yes	Non-human primates	I would study the cognition of nearly any animal.	4	No	0	N/A	3	3	2	2	2	2	0	0	0	0	0	0	0	0	1	0	0	0
2	Yes :)	Europe	North America / Canada	Psychology		10 to 20 years	Lab / Zoo, Wild	Animal behaviour	Yes, but there is consensus in only few concepts	1	2	3	3	3	2	3	1	2	1	1	2	3	1	5	Yes	Fish / Marine animals	whales, dolphins	4	Yes	2	I have used naturalistic predator models to mimic real predators and placed them in positions where they would normally be encountered in the wild. Having seen gibbons' prior responses, I never presented model predators to gibbon females that were pregnant or had very young infants, as I expected this would cause undue stress that may harm their infant.	3	3	3	3	3	3	1	0	0	0	0	0	2	1	0	0	0	0
2	Yes :)	North America / Canada	North America / Canada	Behavioral Biology	38	10 to 20 years	Lab / Zoo, Free range / Reserve, Wild	Animal behaviour	Yes, there is consensus in almost all the concepts of our discipline	2	2	3	3	3	2	3	1	2	2	3	3	1	3	5	Yes	Invertebrates	Salticidae (jumping spiders)	4	Does not apply (because I work in the wild / because I do observational studies, etc)	0	does not apply	3	2	3	3	3	3	1	0	0	0	0	0	0	1	1	0	0	0
2	Yes :)	Europe	Europe	Biology /Marine Biology		0 to 5 years	Free range / Reserve, Wild	Animal behaviour	Yes, but there is consensus in only few concepts	3	3	3	3	3	2	1	3	3	1	1	1	1	9	3	Yes	Farm animals (Horses, chicken...)	pig	5	Does not apply (because I work in the wild / because I do observational studies, etc)	2	considered all sensorial modalities (e.g. olfaction is very prevalent) so cleaned props	3	3	3	3	3	3	0	0	0	0	1	0	0	0	0	0	0	1
2	Yes :)	North America / Canada	North America / Canada	Biology /Marine Biology	32	5 to 10 years	Wild	Animal behaviour	Yes, but there is consensus in only few concepts	2	3	3	3	3	2	3	1	2	1	2	3	1	7	4	Yes	Birds	Cacatuidae and/or Corvus	4	Yes	1	it does not apply	3	3	3	3	2	3	1	0	0	0	0	0	1	1	0	0	1	0
2	Yes :)	Europe	Europe	Biology /Marine Biology	30	0 to 5 years	Lab / Zoo	Animal behaviour	Yes, but there is consensus in only few concepts	2	2	3	3	3	2	2	1	2	2	2	2	1	8	3	Yes	Invertebrates	Ants	1	Yes	0	it does not apply	2	3	2	2	1	1	0	2	2	2	0	0	1	0	1	0	1	0
2	Yes :)	Europe	Asia	Environmental sciences	33	0 to 5 years	Lab / Zoo, Wild	Animal behaviour	Yes, but there is consensus in only few concepts	1	2	3	3	3	2	2	1	3	3	3	3	3	5	3	Yes	Non-human primates	does not apply	6	No	0	does not apply	3	3	3	2	2	3	1	1	1	2	0	0	2	0	0	0	2	0
2	Yes :)	North America / Canada	Europe	Biology /Marine Biology	36	5 to 10 years	Lab / Zoo, Wild	Animal behaviour	Yes, but there is consensus in only few concepts	2	2	2	3	2	1	1	1	2	2	2	2	2	3	1	Yes	Fish / Marine animals	damsel fish, bluegill, french grunts, squirrel fish, midshipman	1	Yes	1	it does not apply	3	2	1	1	3	2	1	0	0	0	0	0	2	1	0	0	2	0
2	Yes :)	North America / Canada	North America / Canada	Neuroscience	37	10 to 20 years	Lab / Zoo	Animal behaviour	Yes, but there is consensus in only few concepts	2	2	3	2	3	2	2	1	3	2	2	2	3	8	1	Yes	Not listed above (you'll be able to specify them in the next question)	ferret	5	No	0	it does not apply	3	1	3	3	2	3	1	0	0	2	0	0	1	0	2	0	2	0
2	Yes :)	Europe	Europe	Environmental Studies	33	5 to 10 years	Lab / Zoo, Free range / Reserve, Wild	Animal behaviour	Yes, there is consensus in almost all the concepts of our discipline	3	2	3	3	3	2	3	1	3	1	3	3	1	4	1	Yes	Birds	Sturnus unicolor, Ficedula hypoleuca, Luscinia svecica	1	No	0	it does not apply	3	0	3	3	3	3	1	3	3	1	3	3	3	2	3	3	3	2
2	Yes :)	Europe	Europe	Neuroscience		10 to 20 years	Lab / Zoo	Animal cognition	Yes, but there is consensus in only few concepts	2	2	3	1	3	2	2	1	2	2	2	2	3	3	3	Yes	Birds	Cephalopodes	4	No	1	enriched housing (socially and physically), testing at natural rhythms	3	3	3	2	2	2	1	2	2	1	0	0	1	1	0	0	1	1
2	Yes :)	Europe	Europe	Psychology		5 to 10 years	Lab / Zoo	Comparative Psychology	Yes, but there is consensus in only few concepts	2	2	3	3	2	1	2	2	2	1	2	2	3	2	4	Yes	Non-human primates	chimps	1	No	1	conceptually, as a framework	3	3	2	2	3	3	1	1	3	3	1	2	3	3	3	3	3	3
2	Yes :)	Europe	Europe	Biology /Marine Biology	48	more than 20 years	Free range / Reserve, Wild	Animal behaviour	Yes, but there is consensus in only few concepts	1	1	2	3	3	1	1	1	1	1	2	1	1	1	3	Yes	Not listed above (you'll be able to specify them in the next question)	Felis catus (I actually also study those)	4	No	2	Behavioural Ecology is about how the environment affects behaviour. The environment (social, biotic, and abiotic) = Umwelt.	3	3	3	3	2	3	1	3	3	3	3	3	3	3	3	3	3	3
2	Yes :)	North America / Canada	Europe	Evolutionary Anthropology	31	10 to 20 years	Lab / Zoo	Animal cognition	Yes, but there is consensus in only few concepts	3	3	3	3	3	2	3	2	3	2	2	1	1	1	1	Yes	Invertebrates	octopus	1	No	2	leveraging social stimuli, which are of naturally high interest to apes, to engage them	3	3	3	3	3	3	1	1	1	0	2	0	1	0	0	0	1	1
2	Yes :)	Europe	Europe	Psychology	33	0 to 5 years	Lab / Zoo	Comparative Psychology	Yes, but there is consensus in only few concepts	2	2	1	3	1	1	2	1	3	1	2	1	3	1	4	Yes	Dogs/wolves	Dogs	4	No	0	Does not apply	2	1	1	2	2	2	0	0	0	0	1	0	0	0	0	0	0	0
2	Yes :)	Europe	Europe	Psychology	42	10 to 20 years	Wild	Animal cognition	Yes, but there is consensus in only few concepts	2	3	3	3	3	2	3	2	3	2	2	2	3	10	4	Yes	Not listed above (you'll be able to specify them in the next question)	many species of social mammal	5	Does not apply (because I work in the wild / because I do observational studies, etc)	2	Look at the problems elephants actually face and solve in their natural environments, and explore those rather than applying artificial tests of cognition used in other species	3	3	3	3	2	2	1	3	3	3	3	3	3	3	3	3	3	3
2	Yes :)	Central / South America	Europe	Biology /Marine Biology	40	10 to 20 years	Wild	Animal behaviour	Yes, but there is consensus in only few concepts	1	2	2	3	2	2	2	1	2	1	2	1	2	3	1	Yes	Non-human primates	Any species suitable to test the questions I'm interested in	1	No	2	Design takes into account the species sensory system, morphology, etc	3	3	3	2	1	3	1	3	3	3	3	3	3	3	1	3	3	1
[truncated: 36 more columns]

## Sheet: Coding
northamerican	1
southamerican	2
europe	3
africa	4
asia	5
oceania	6
Biology /Marine Biology	1
Psychology	2
Philosophy	3
other	4
0 to 5 years	1
5 to 10 years	2
10 to 20 years	3
more than 20 years	4
Lab / Zoo	1
Free range / Reserve	2
Wild	3
mixed tiene lab	4
mixed no tiene lab	5
an beh	1
an cog	2
ethol	3
other	4
Yes, there is consensus in almost all the concepts of our discipline	2
Yes, but there is consensus in only few concepts	1
No, there is almost no consensus in the concepts of our discipline	0
To know more about X non-human species	1
To know more about the differences/similarities between X and Y non-human species	2
To know more about the differences/similarities between X non-human species and humans	3
Non-human primates	1
Dogs/wolves	2
Birds	3
Non avian reptiles	4
Fish / Marine animals	5
Farm animals (Horses, chicken...)	6
Insects / Invertebrates	7
Rodents	8
Wild carnivores (Bear, Hyena...)	9
Other	10
Little consensus	1
Moderate consensus	2
Lot of consensus	3
To know more about X non-human species	1	Species
To know more about the differences/similarities between X and Y non-human species	2	Two Species
To know more about the differences/similarities between X non-human species and humans	3	Species vs Humans
I could investigate more in my research question / It is a model species	1	Question/Model
Availability / low cost maintenance / sample size	2	Management
Chance / Job opportunity / Funding	3	Chance
Fascination about that/those species	4	Love
It is understudied	5	Understudied
It is very skilled / clever	6	Skills
0 to 7 subjects	1
8 to 12 subjects	2
13 to 20 subjects	3
21 to 40 subjects	4
more than 40 subjects	5
